# Supplementary material for: COVID-19 in the context of pregnancy, infancy and parenting (CoCoPIP) study: protocol for a longitudinal study of parental mental health, social interactions, physical growth and cognitive development of infants during the pandemic
Source: PubMed Central journal article supplement (PMC9170803; doi:10.1136/bmjopen-2021-053800), 2022-06-06
Supplement: bmjopen-2021-053800supp002.pdf [file bmjopen-2021-053800supp002.pdf]

| Measure (items)                                 | Description                                                                                                                                                | Scale                                                                                 | Example item                                                                                                                                      |
|-------------------------------------------------|------------------------------------------------------------------------------------------------------------------------------------------------------------|---------------------------------------------------------------------------------------|---------------------------------------------------------------------------------------------------------------------------------------------------|
| <b>COVID-19 items</b>                           |                                                                                                                                                            |                                                                                       |                                                                                                                                                   |
| Situational influences                          | Assessing adjustment and adherence to government guidelines.                                                                                               |                                                                                       | 'When did you modify your routine to adhere to the social distancing guidance?'                                                                   |
| Health report                                   | Assessing risk for COVID exposure and symptoms of parents, partner and/or social network. As well as self-isolation behaviours and support (if applicable) |                                                                                       | 'Have you been diagnosed with COVID?'<br>'How supported did you feel during self-isolation?'                                                      |
| COVID Impact (7 items)                          | How COVID-19 has impacted themselves and their household (e.g., physical health, disruption to routine).                                                   | Five-point scale from 'not hard at all, coping well' to 'unbearable, not coping well' |                                                                                                                                                   |
| COVID Concern (10 items)                        |                                                                                                                                                            | Six-point scale from 'not at all' to 'all the time'                                   | 'I am not worried about COVID-19'                                                                                                                 |
| Event Impact Scale-Revised (20 items) †         | Assessing the distress experience as a result of traumatic events                                                                                          | Five-point scale from 'extremely' to 'not at all'                                     | 'I felt irritable and angry'                                                                                                                      |
| Social distance impacts                         | Assessing participants attitudes and experience during COVID-19.                                                                                           | Five-point scale from 'not at all' to 'very true'                                     | 'I spend my leisure time more intentionally'                                                                                                      |
| Vaccines                                        | Assessing access to and attitude towards a vaccine and potential changes in social behaviour in relation to a vaccine.                                     |                                                                                       | 'Are you currently eligible for the COVID-19 vaccine?' / 'Could you tell us how and/or why getting vaccinated has changed the way you socialise?' |
| <b>Parental information</b>                     |                                                                                                                                                            |                                                                                       |                                                                                                                                                   |
| State-Trait Anxiety state (STAI-S) (20 items) † | Assessing the presence and severity of an individual's state-based anxiety (i.e., anxiety in response to what is happening right now).                     | Four-point scale from 'not at all' to 'very much so'                                  | 'I feel strained'                                                                                                                                 |
| Caregiving support                              | Questions assessing remote and in person availability of household members, partners, and social network of families                                       |                                                                                       |                                                                                                                                                   |
| Home schooling                                  | Exploring the additional demands on parents in the home and support available for home schooling.                                                          |                                                                                       | 'Could you describe your experience of home schooling during your pregnancy or as a new parent?'                                                  |
| Stress Life Inventory (43 items) †              | Assessing the number of stressful life events experienced by the family over a 12-month period                                                             | Items rates 'yes' or 'no'                                                             | 'Being fired at work'                                                                                                                             |

|                                                                     |                                                                                                                                                                                           |                                                                                                                              |                                                                                                                                                             |
|---------------------------------------------------------------------|-------------------------------------------------------------------------------------------------------------------------------------------------------------------------------------------|------------------------------------------------------------------------------------------------------------------------------|-------------------------------------------------------------------------------------------------------------------------------------------------------------|
| Pregnancy related anxiety questionnaire (PRAQ) (20 items)*          | Assessing pregnancy-specific anxiety in women during the antenatal period.                                                                                                                | Five-point scale from ‘not at all’ to ‘very much’                                                                            | ‘I think that after birth my child will be in poor health’ / ‘I think about creating a virus-free home for my child’                                        |
| <b>Pregnancy information</b>                                        |                                                                                                                                                                                           |                                                                                                                              |                                                                                                                                                             |
| Healthcare support and access                                       | Exploring parental experiences of their healthcare support and care, and access to antenatal routine care during the pandemic                                                             |                                                                                                                              | ‘Do you feel comfortable attending your pregnancy appointments?’/ ‘Could you tell us about the support from your healthcare provides during your pregnancy’ |
| Antenatal Emotional Attachment Scale (AEAS) - Maternal (19 items) † | Questions asking expectant parents about their thoughts and feelings over the last two-week period about their baby                                                                       | Responses on a varying five-point scale (e.g., ‘almost all the time’ to ‘not at all’ and ‘very positive’ to ‘very negative’) | ‘I think of the developing baby as mostly as;’                                                                                                              |
| Antenatal Emotional Attachment Scale (AEAS) – Paternal (16 items) † |                                                                                                                                                                                           |                                                                                                                              | ‘I have found myself touching, or rubbing with my hand, the outside of my partners stomach where the baby is:’                                              |
| <b>Toddler outcomes</b>                                             |                                                                                                                                                                                           |                                                                                                                              |                                                                                                                                                             |
| Infant Behaviour Questionnaire (IBQ) – short form (36 items) †      | Measures the dimensions of temperament in children younger than 12 months of age                                                                                                          | Eight-point scale from ‘never’ to ‘always’ (including option for ‘does not apply’)                                           | ‘When tired, how often did your baby show distress?’                                                                                                        |
| Infant/Toddler Sensory Profile (ITSP) (36 items) †                  | A caregiver report on how responsive, sensitive, avoidant and alert their babies are when presented with stimuli visual, auditory, tactile and vestibular modalities                      | Six-point scale from ‘almost always’ to ‘almost never’ (including an option for ‘does not apply’)                            | ‘My child is active throughout the day’                                                                                                                     |
| Ages and Stages (ASQ-3) (39 items) †                                | A developmental screening tool assessing a child’s developmental progress in six domains (i.e., communication, gross motor, fine motor, problem solving and personal-social development). | Three-point scale from ‘yes’ to ‘not yet’                                                                                    | ‘When your baby wants something, does he tell you by pointing to it?’                                                                                       |
| Oxford Communication Development Inventory – 100 words (CDI) †      | A UK-adapted measure of toddler language development                                                                                                                                      | Two-point scale; ‘understands’ and ‘understands and says’                                                                    | ‘car’                                                                                                                                                       |
| Quantitative Checklist for Autism in Toddlers (Q-CHAT) (25 items) † | A quantitative measure of early autistic traits in toddlers                                                                                                                               | Responses given on a varying five-point scale (e.g., ‘many times a day to never’ and ‘always’ to ‘never’)                    | ‘How easy is it for your child to adapt when his/her routine changes or when things are out of their usual place?’                                          |
| Vineland parent and caregiver form †                                | A number of questions about the home environment and family-life behaviour                                                                                                                | Three-point scale from “usually or often” to ‘never’                                                                         | ‘When you look or point at something, looks in that direction.’                                                                                             |

| <b>Parenting, family and home environment</b>                               |                                                                                                                                                                       |                                                                                         |                                                                                                                                                |
|-----------------------------------------------------------------------------|-----------------------------------------------------------------------------------------------------------------------------------------------------------------------|-----------------------------------------------------------------------------------------|------------------------------------------------------------------------------------------------------------------------------------------------|
| Household space and environment                                             | Assessing access to outdoor/indoor space and technology                                                                                                               |                                                                                         | 'Do you currently have access to outdoor space you feel safe spending time in?' / 'In your home, how many mobile phones are presently in use?' |
| Parent-infant attachment                                                    | Parental description of relationship with infant (imagined and actual)                                                                                                |                                                                                         | 'Could you tell us a little about what you image your baby will be like and how the two of you will get along?'                                |
| Face-to-face interaction index                                              | Exploring the frequency of face-to-face and distant interaction the infant has had since birth                                                                        |                                                                                         | 'How often did you with/without your baby video chat with others?'/ 'How responsive is your baby to others during virtual interactions?'       |
| Parenting reflective functioning questionnaire (PRFQ) (18 item) †           | A short measure assessing parental reflective functioning or mentalising.                                                                                             | Responses are rated on a seven-point scale from 'strongly disagree' to 'strongly agree' | 'I always know why my child acts the way he or she does'                                                                                       |
| Comprehensive early childhood parenting questionnaire (CECPAQ) (54 items) † | A parent report measure assessing five domains of parenting (i.e., support, stimulation, structure, harsh discipline and positive measure).                           | Responses are rated on a six-point scale from 'never' to 'always'                       | 'When my child is having a hard time, I am able to help him/her.'                                                                              |
| Difficulties in Emotion Regulation Scale (DERS) (19 items) †                | A self-report measure of subjective emotion ability                                                                                                                   | Responses are rated on a five-point scale from 'almost never' to 'almost always'        | 'When I'm upset, I can still get things done'                                                                                                  |
| Family demographics and socioeconomic questions                             | Parent and infant age or gestation of pregnancy; sex; ethnicity; location; parent and partner highest level of qualification; employment status and household income. |                                                                                         | 'What is your highest level of education?'                                                                                                     |
| Postcode                                                                    | Used to derived indices of multiple deprivation.                                                                                                                      |                                                                                         |                                                                                                                                                |

\*several questions have been adapted for use during COVID-19

†These items have not been included within the supplementary information as they are standardised questionnaires and not specifically created for this study.

*Supp Table 1: A detailed summary of measures used within the study.*
